# Supplementary material for: Facile and scalable synthesis of 2D porous Ni/C via a salt-template assisted approach for enhanced urea oxidation reaction and energy-saving hydrogen production
Source: Royal Society of Chemistry journal article supplement (doi:10.1039/d2nj06002g), 2023-01-01
Supplement: d2nj06002g1.pdf [file d2nj06002g1.pdf]

## Supporting Information

### **Facile and scalable synthesis of 2D porous Ni/C via a salt-template assisted approach for enhanced urea oxidation reaction and energy-saving hydrogen production**

Fengjiao Li<sup>a,b,\*</sup>, Xiaoming Zhang<sup>a</sup>, Shuting Liang<sup>c,\*</sup>, Mingjuan Sun<sup>a</sup>, Xiaolin Zhao<sup>a</sup>, Haiwei Chen<sup>a,\*</sup>, Yanhui Cui<sup>a</sup>

<sup>a</sup> Shenzhen Automotive Research Institute, Beijing Institute of Technology, Shenzhen 518118, Guangdong, China.

<sup>b</sup> National Engineering Laboratory for Electric Vehicles, Beijing Institute of Technology, Beijing 100081, Beijing, China.

<sup>c</sup> Chongqing Key Laboratory of Environmental Materials & Remediation Technologies, Chongqing University of Arts and Sciences, Chongqing 402160, China.

#### **Corresponding author:**

Email: lifengjiao@szari.ac.cn; 20180046@cqwu.edu.cn; chenhaiwei@szari.ac.cn.

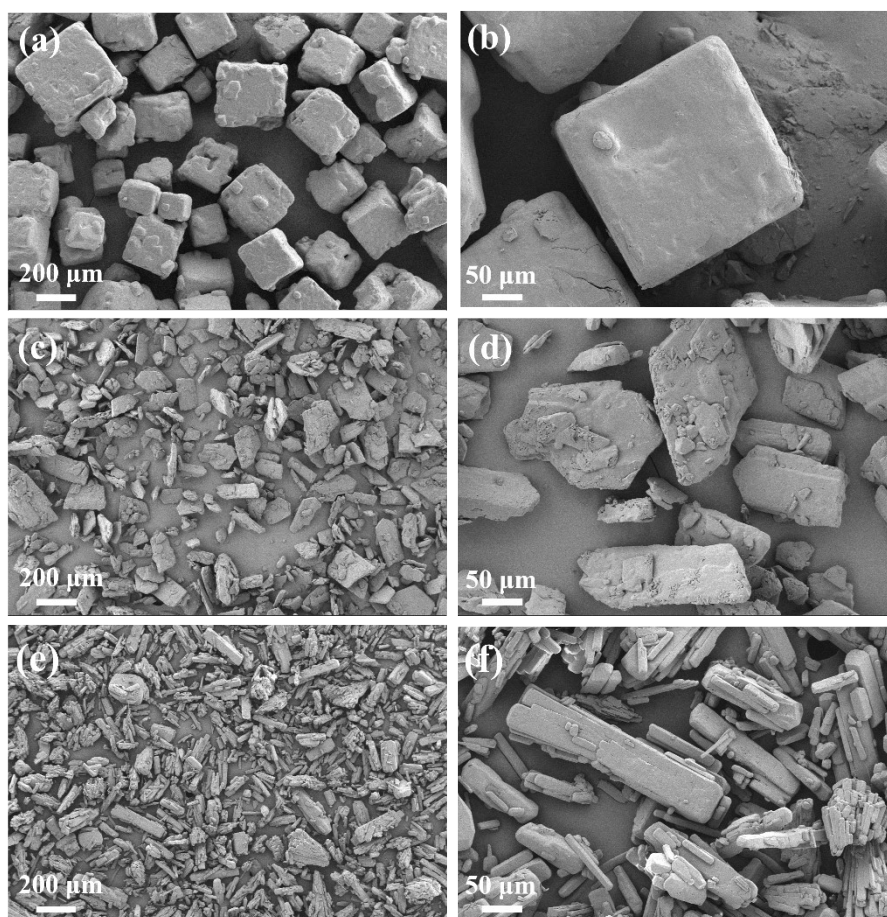

**Fig. S1** SEM images of commercial NaCl (a-b), glucose (c-d), and Ni(Ac)<sub>2</sub>·4H<sub>2</sub>O (e-f) crystals at different magnitudes.

The commercial NaCl crystals showed typical cubic morphology with smooth surfaces (**Fig. S1a-b**). The commercial glucose was consisted of faceted tabular crystals (**Fig. S1c-d**). And the commercial Ni(Ac)<sub>2</sub>·4H<sub>2</sub>O was composed of oblong rectangular crystallites (**Fig. S1e-f**).

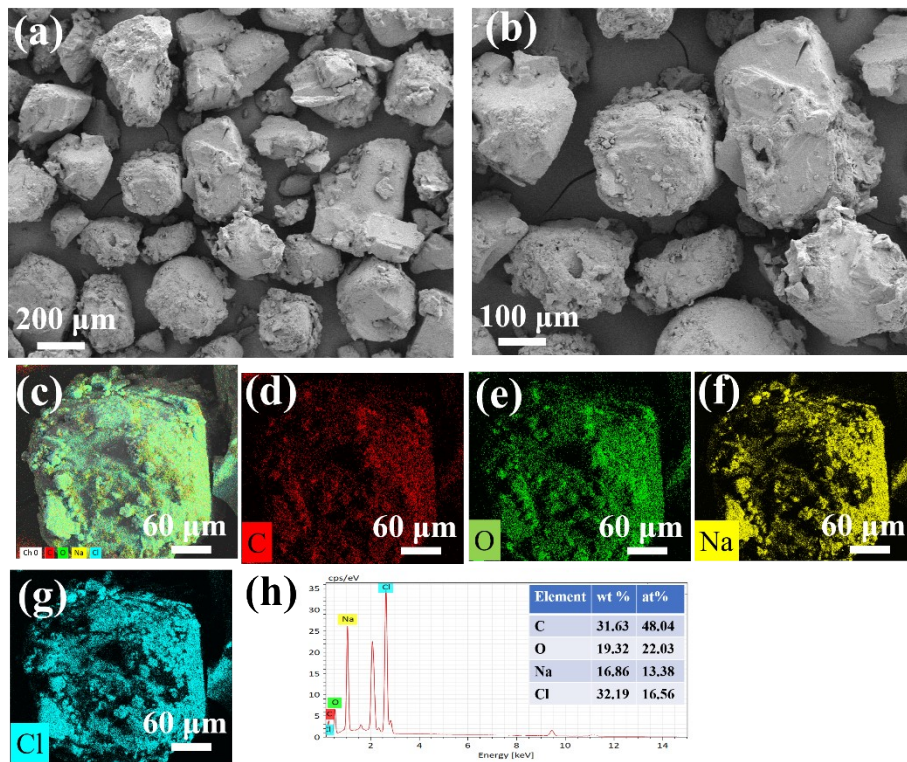

**Fig. S2** SEM images (a-b) and element mapping of (c) mix, (d) C, (e) O, (f) Na, (g) Cl and (h) SEM-EDS spectrum of the dried mixture precursor of 0-Ni/CS.

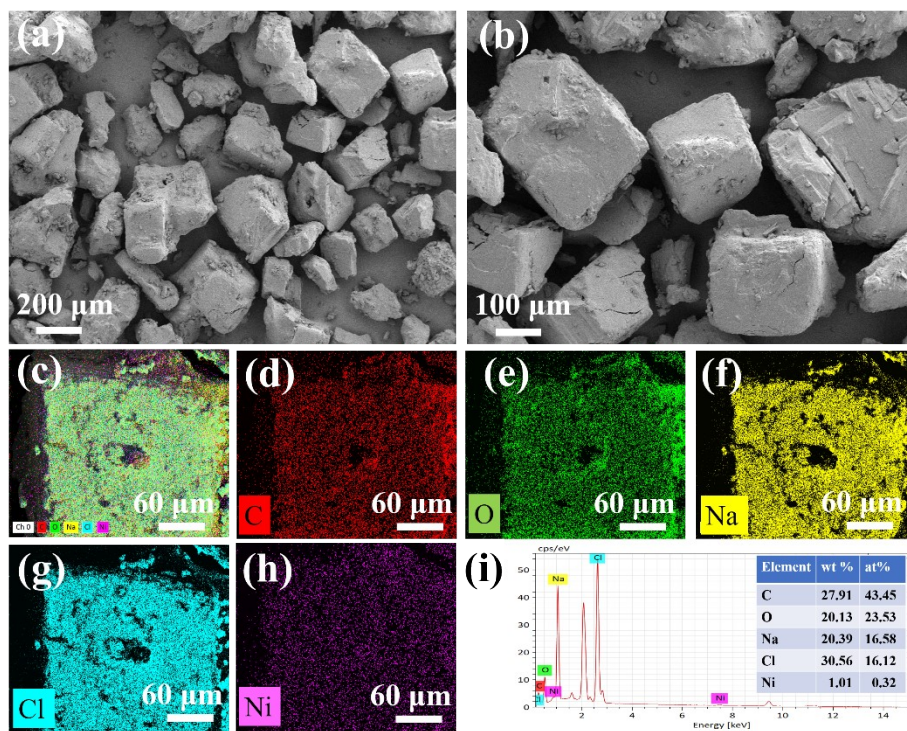

**Fig. S3** SEM images (a-b) and element mapping of (c) mix, (d) C, (e) O, (f) Na, (g) Cl, (h) Ni and (i) SEM-EDS spectrum of the dried mixture precursor of 2-Ni/CS.

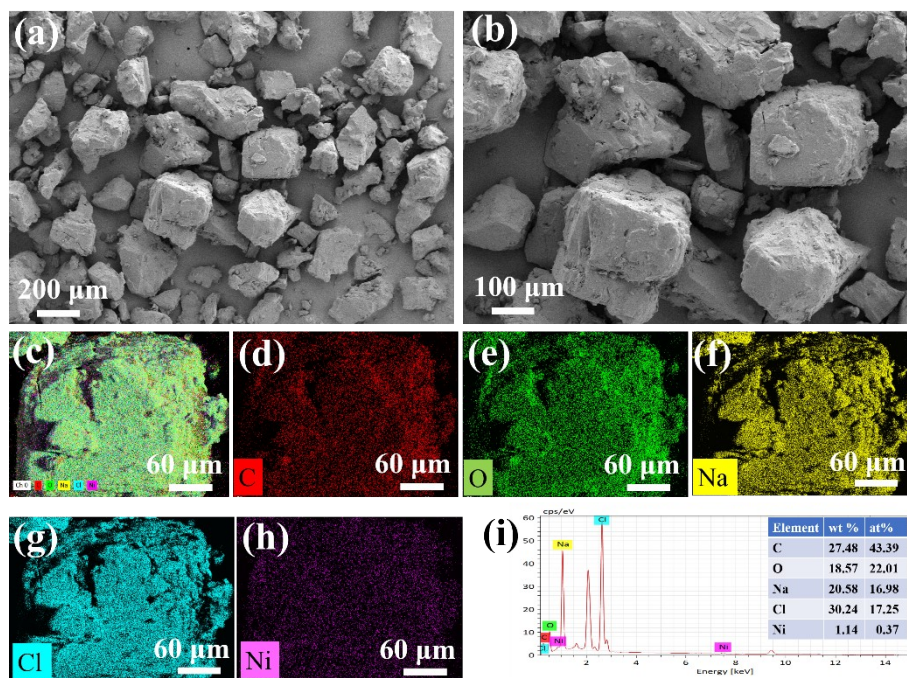

**Fig. S4** SEM images (a-b) and element mapping of (c) mix, (d) C, (e) O, (f) Na, (g) Cl, (h) Ni and (i) SEM-EDS spectrum of the dried mixture precursor of 4-Ni/CS.



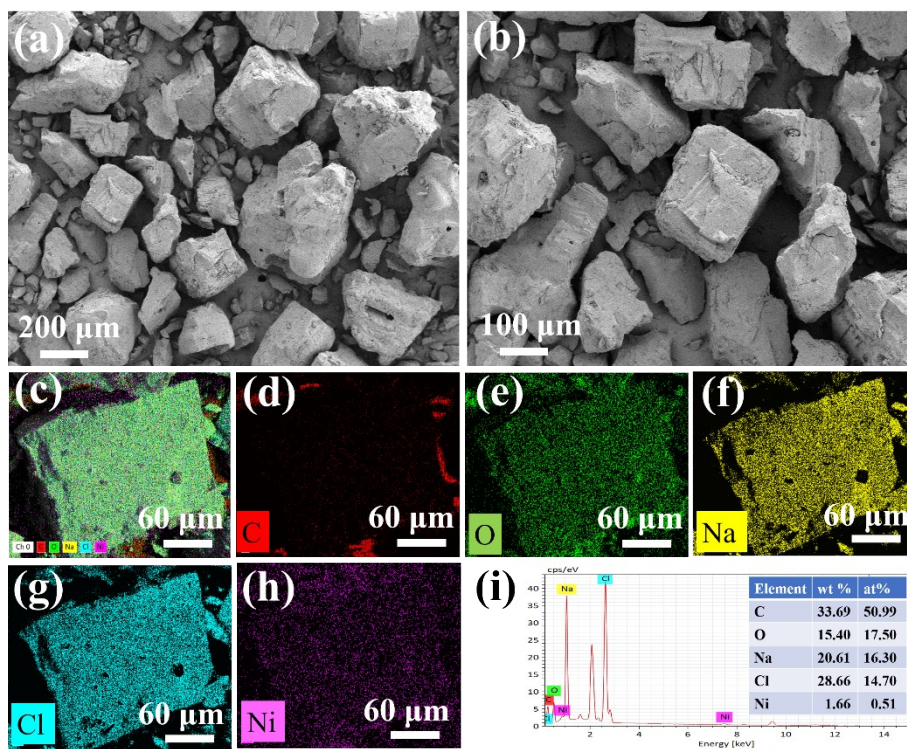

**Fig. S5** SEM images (a-b) and element mapping of (c) mix, (d) C, (e) O, (f) Na, (g) Cl, (h) Ni and (i) SEM-EDS spectrum of the dried mixture precursor of 8-Ni/CS.

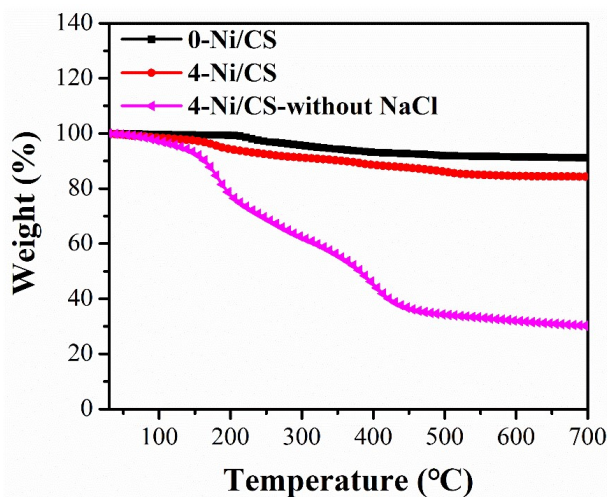

**Fig. S6** TG analysis in Ar for the dried 0-Ni/CS, 4-Ni/CS and 4-Ni/CS-without NaCl precursors before carbonization.

**Fig. S6** displays the thermal behavior in Ar for the dried 0-Ni/CS, 4-Ni/CS and 4-Ni/CS-without NaCl precursors before carbonization from room temperature to 700 °C with the heating rate of 5 °C min<sup>-1</sup>. It can be obviously seen that a slight mass loss appeared before 150 °C due to the elimination of moisture. The larger mass loss between 150 °C and 550 °C was mainly attributed to the decomposition of Ni(Ac)<sub>2</sub>·4H<sub>2</sub>O to form nickel oxide. Afterwards, a very subtle mass loss between 600 and 700 °C was mainly derived from char formation and reduction of nickel oxide to metallic nickel. Notably, 4-Ni/CS without NaCl precursor suffered from a huger mass loss over 60% than the other two samples (the 0-Ni/CS precursor and the 4-Ni/CS precursor). The TG results further verified that an annealing temperature of 700 °C was suitable to obtain the targeted Ni/C electrocatalysts.

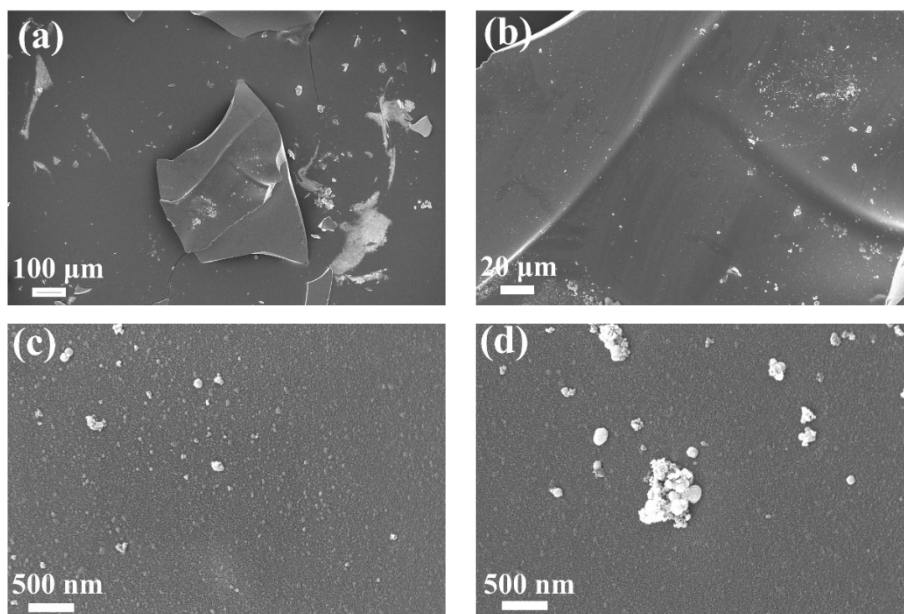

**Fig. S7** SEM images of 4-Ni/CS-without NaCl sample at different magnitudes.



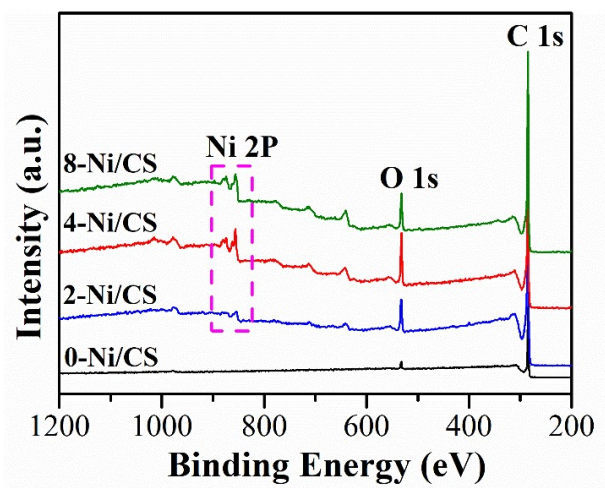

**Fig. S8** XPS survey spectra of all x-Ni/CS samples.

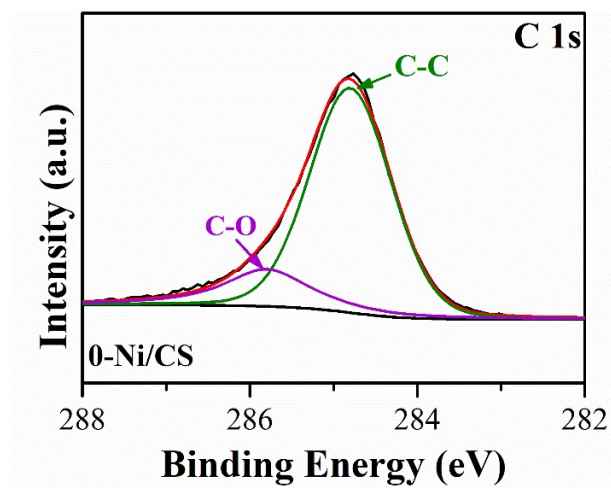

Fig. S9 High-resolution C 1s of 0-Ni/CS sample.

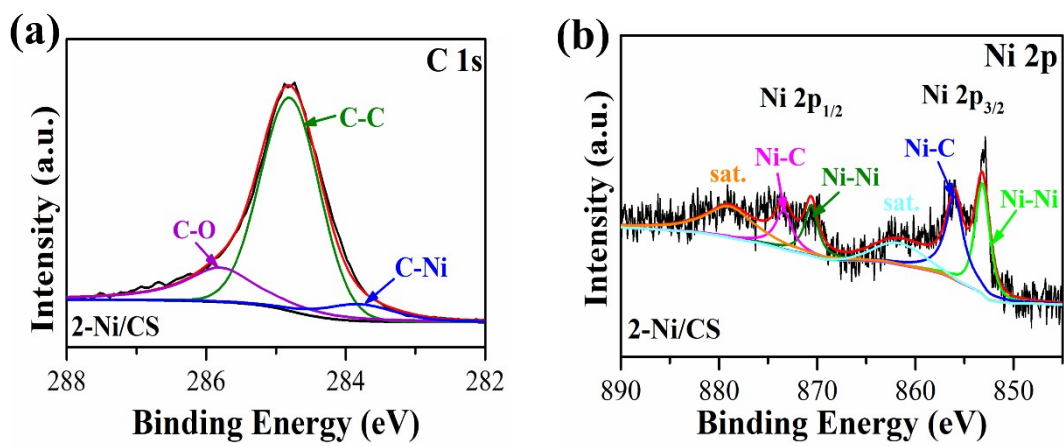

**Fig. S10** High-resolution C 1s (a) and Ni 2p (b) of 2-Ni/CS sample.

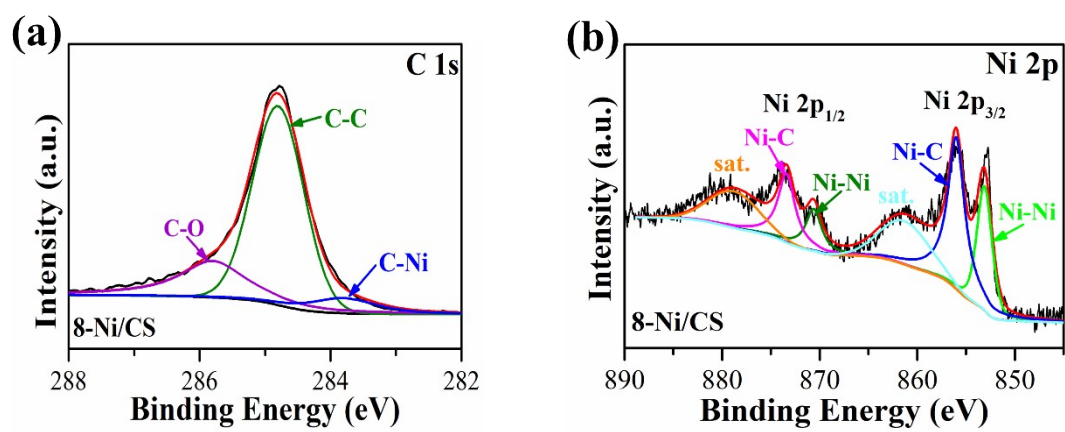

**Fig. S11** High-resolution C 1s (a) and Ni 2p (b) of 8-Ni/CS sample.

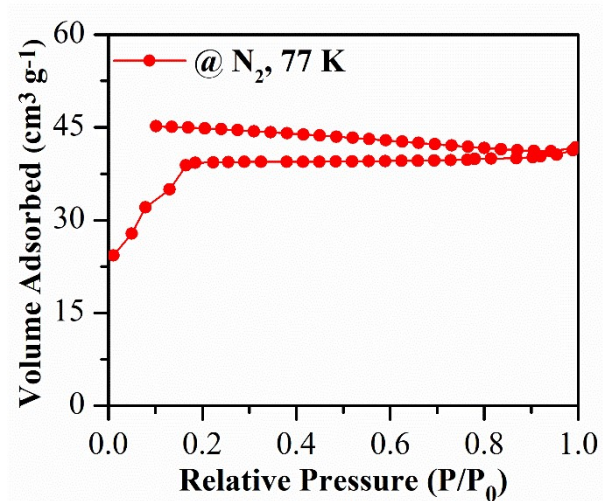

**Fig. S12** N<sub>2</sub> sorption isotherm of 0-Ni/CS obtained from Micromeritics 3Flex.

**Table S1** Textural and structural properties of 0-Ni/CS obtained from N<sub>2</sub> sorption experiment at 77 K.

| Sample  | Analysis conditions   | S <sub>BET</sub> (m <sup>2</sup> g <sup>-1</sup> ) |
|---------|-----------------------|----------------------------------------------------|
| 0-Ni/CS | N <sub>2</sub> , 77 K | 144                                                |



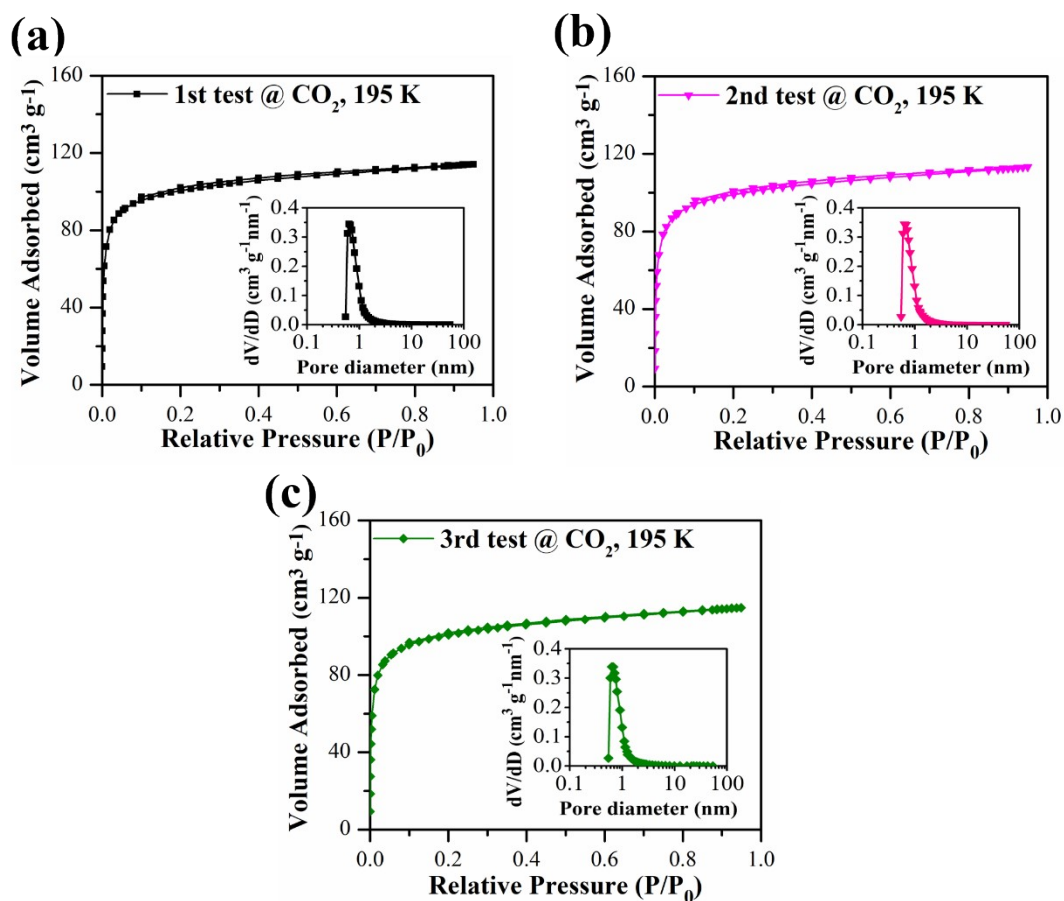

**Fig. S13** CO<sub>2</sub> sorption isotherms and pore size distributions of 0-Ni/CS obtained from Micromeritics 3Flex for different times.

**Table S2** Textural and structural properties of 0-Ni/CS obtained from CO<sub>2</sub> sorption experiments at 195 K.

| Sample               | Analysis conditions        | No. | Sample mass (mg) | $S_L^a$ (m <sup>2</sup> g <sup>-1</sup> ) | $S_{BET}^b$ (m <sup>2</sup> g <sup>-1</sup> ) | $V_p$ (cm <sup>3</sup> g <sup>-1</sup> ) | $D_p^c$ (nm) |
|----------------------|----------------------------|-----|------------------|-------------------------------------------|-----------------------------------------------|------------------------------------------|--------------|
| 0-Ni/CS              | CO <sub>2</sub> ,<br>195 K | 1st | 0.0958           | 382                                       | 342                                           | 0.18                                     | 0.78         |
|                      |                            | 2nd | 0.0741           | 376                                       | 338                                           | 0.18                                     | 0.80         |
|                      |                            | 3rd | 0.0595           | 383                                       | 344                                           | 0.18                                     | 0.79         |
| <b>Average value</b> |                            |     |                  | 380                                       | 341                                           | 0.18                                     | 0.79         |

<sup>a</sup> represents the Langmuir surface area

<sup>b</sup> represents the BET surface area

<sup>c</sup> estimated by applying the Horvath-Kawazoe equation.

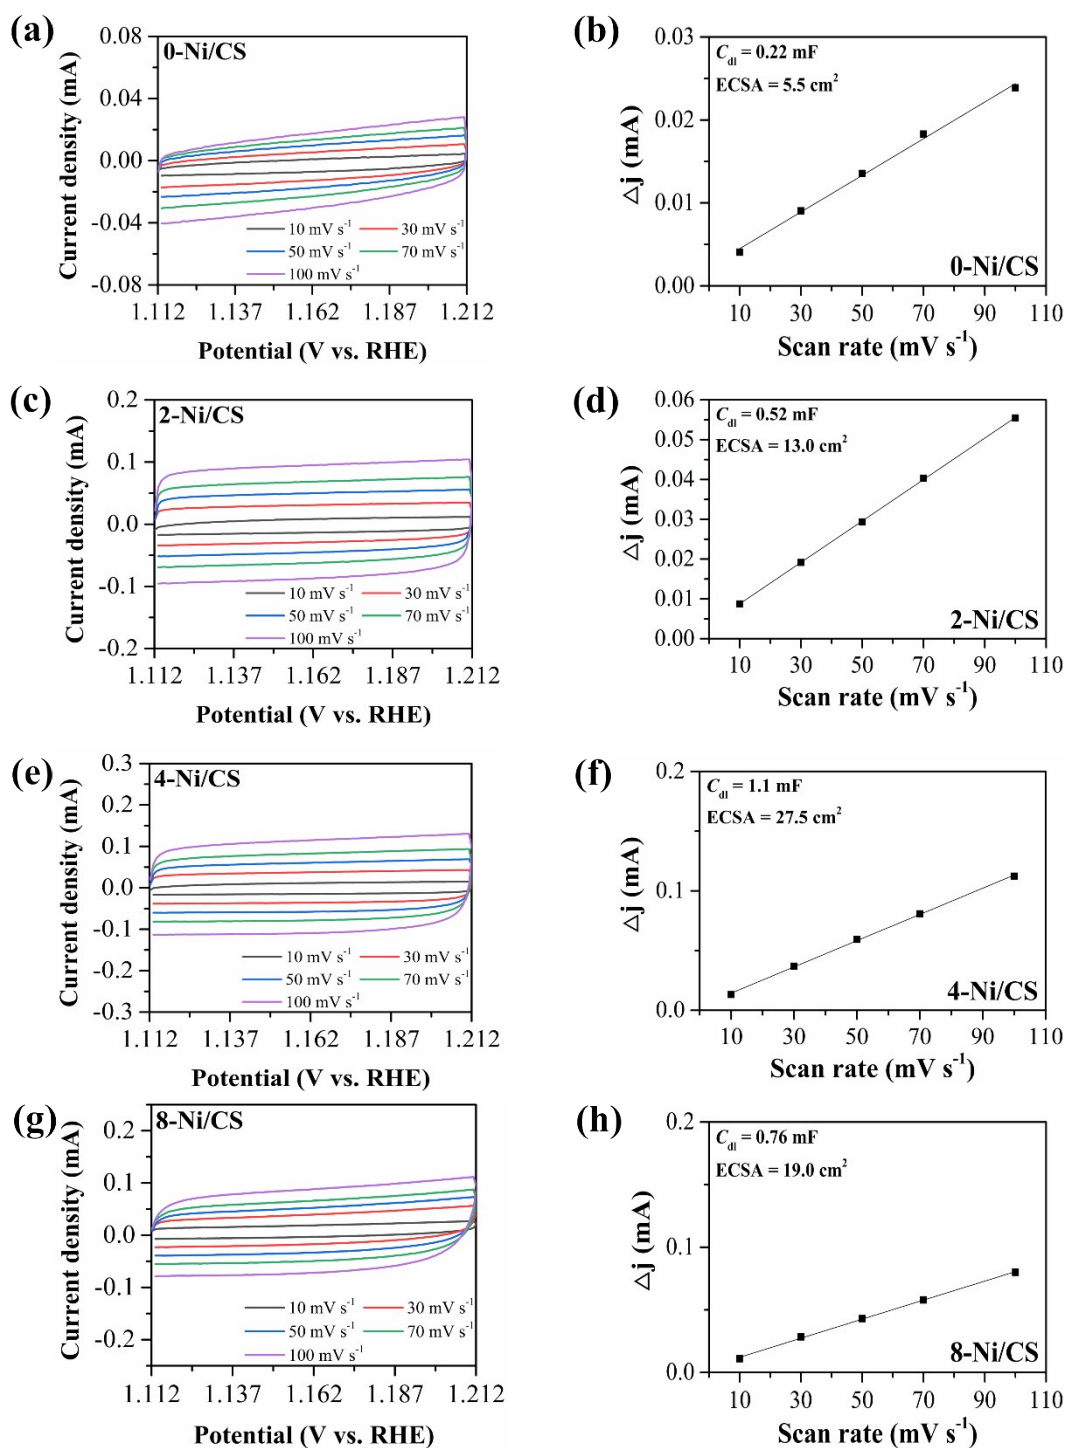

**Fig. S14** CV curves of (a) 0-Ni/CS, (c) 2-Ni/CS, (e) 4-Ni/CS and (g) 8-Ni/CS in 1 M KOH and 0.33 M urea at different scan rates of 10, 30, 50, 70 and 100  $\text{mV s}^{-1}$ ; Current density recorded at 1.162 V vs. RHE as a function of scan rate for (b) 0-Ni/CS, (d) 2-Ni/CS, (f) 4-Ni/CS and (h) 8-Ni/CS.

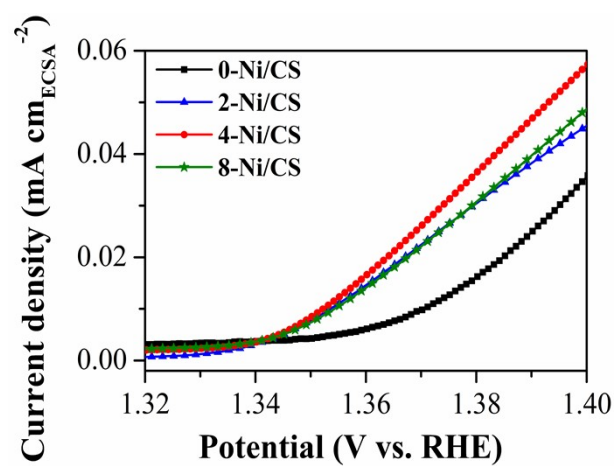

**Fig. S15** ECDSA normalized UOR LSV curves of x-Ni/CS samples in 1 M KOH and 0.33 M urea solution.

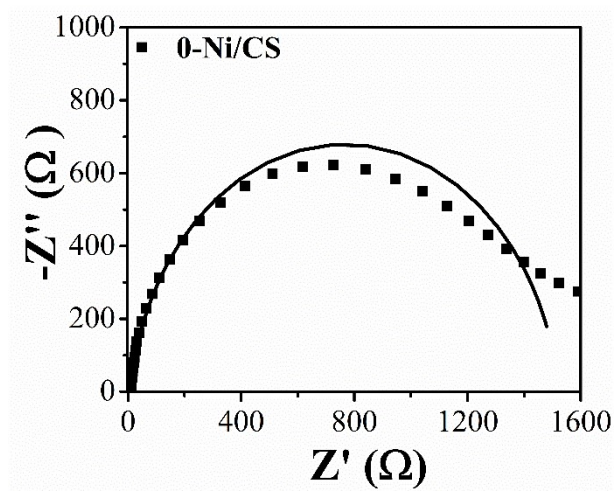

**Fig. S16** Nyquist plots in 1 M KOH and 0.33 M urea for 0-Ni/CS.

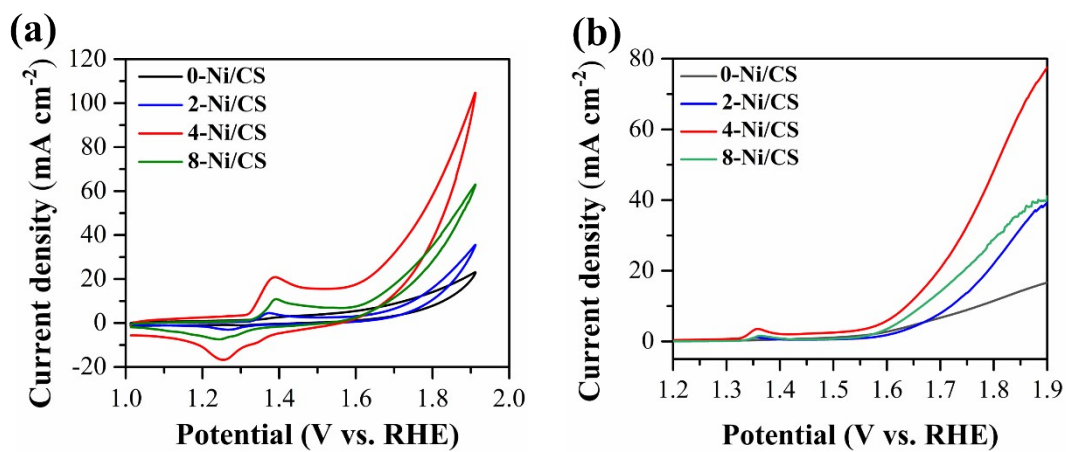

Fig. S17 CV curves (a) and LSV curves (b) in 1 M KOH for Ni/CS samples.



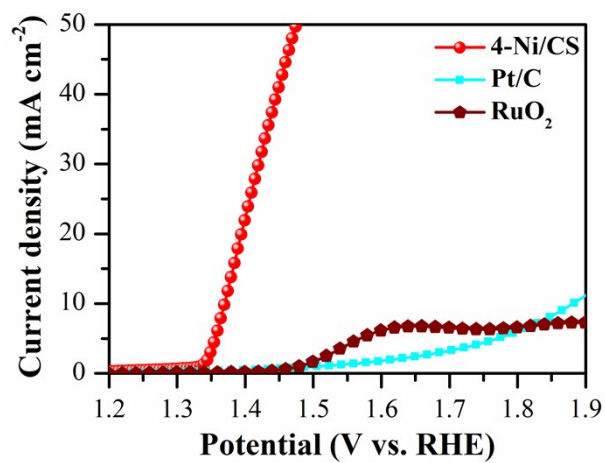

**Fig. S18** The comparison of UOR LSV curves of 4-Ni/CS with the precious Pt/C or RuO<sub>2</sub>.

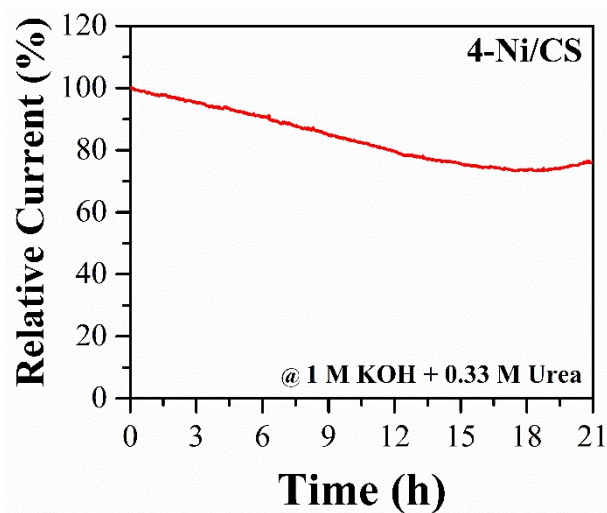

**Fig. S19** Chronoamperometric responses of 4-Ni/CS in 1 M KOH and 0.33 M urea at a constant current density of  $10 \text{ mA cm}^{-2}$  for 21 h.

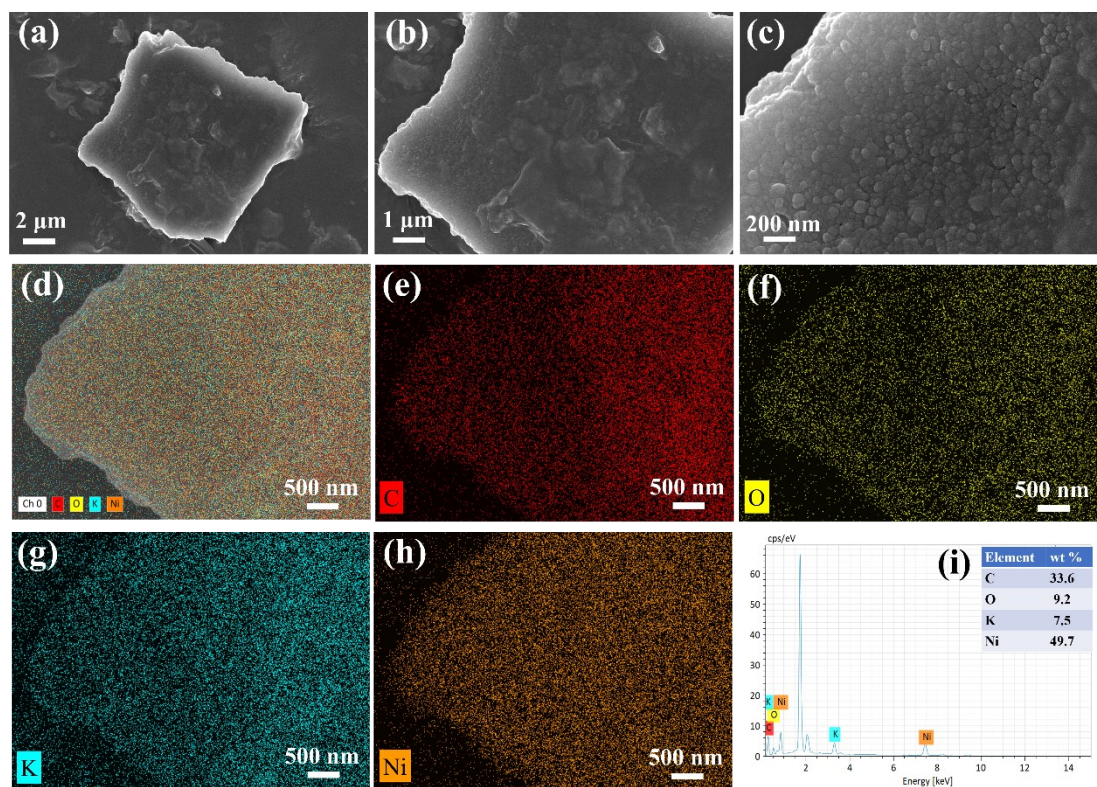

**Fig. S20** SEM images (a-c), element mapping of (d) mix, (e) C, (f) O, (g) K and (h) Ni, and (i) SEM-EDS spectrum of the used 4-Ni/CS after the stability test for UOR.

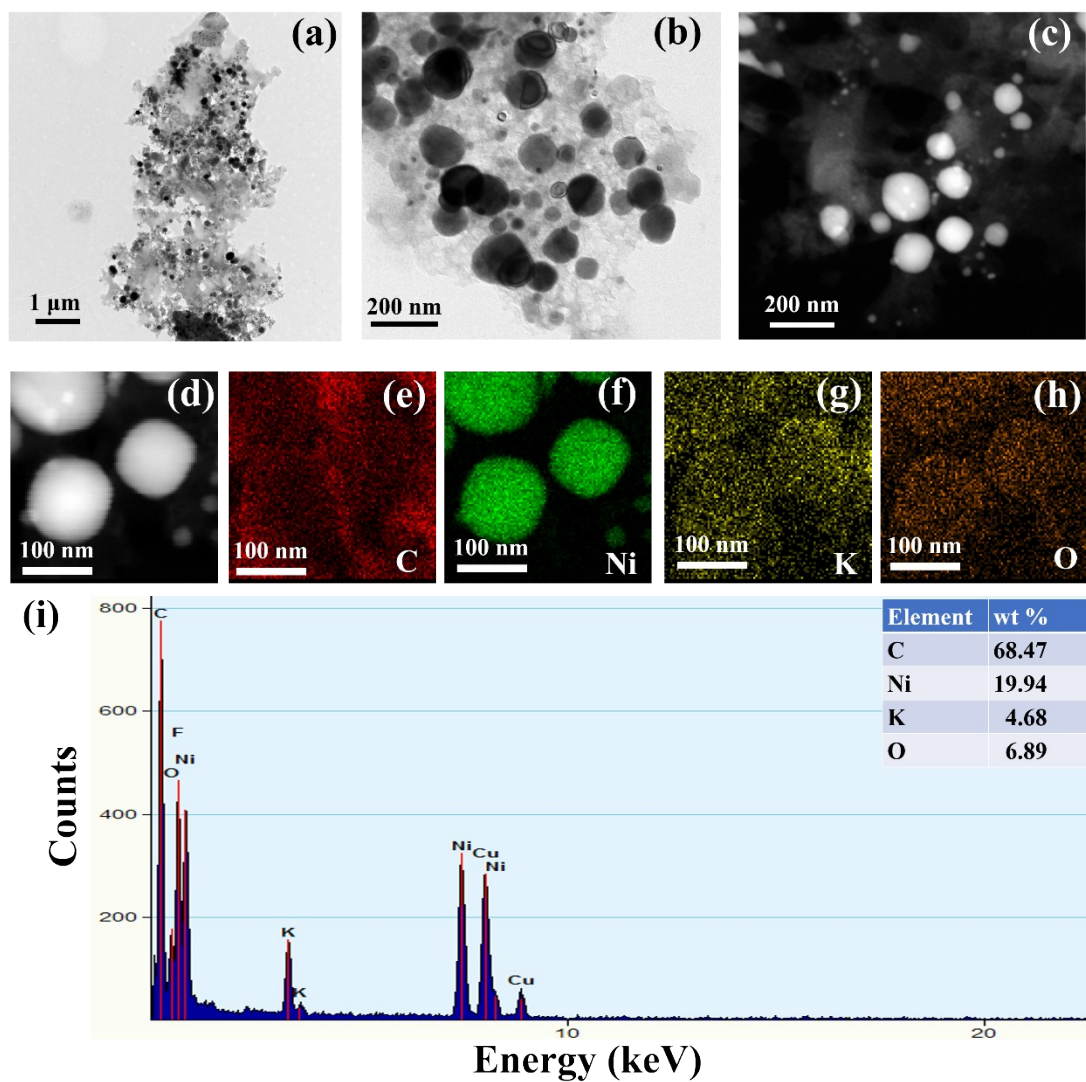

**Fig. S21** TEM images (a-b), STEM-HAADF images (c-d), Element mapping of (e) C, (f) Ni, (g) K and (h) O, and (i) TEM-EDX spectrum of the used 4-Ni/CS after the stability test for UOR.

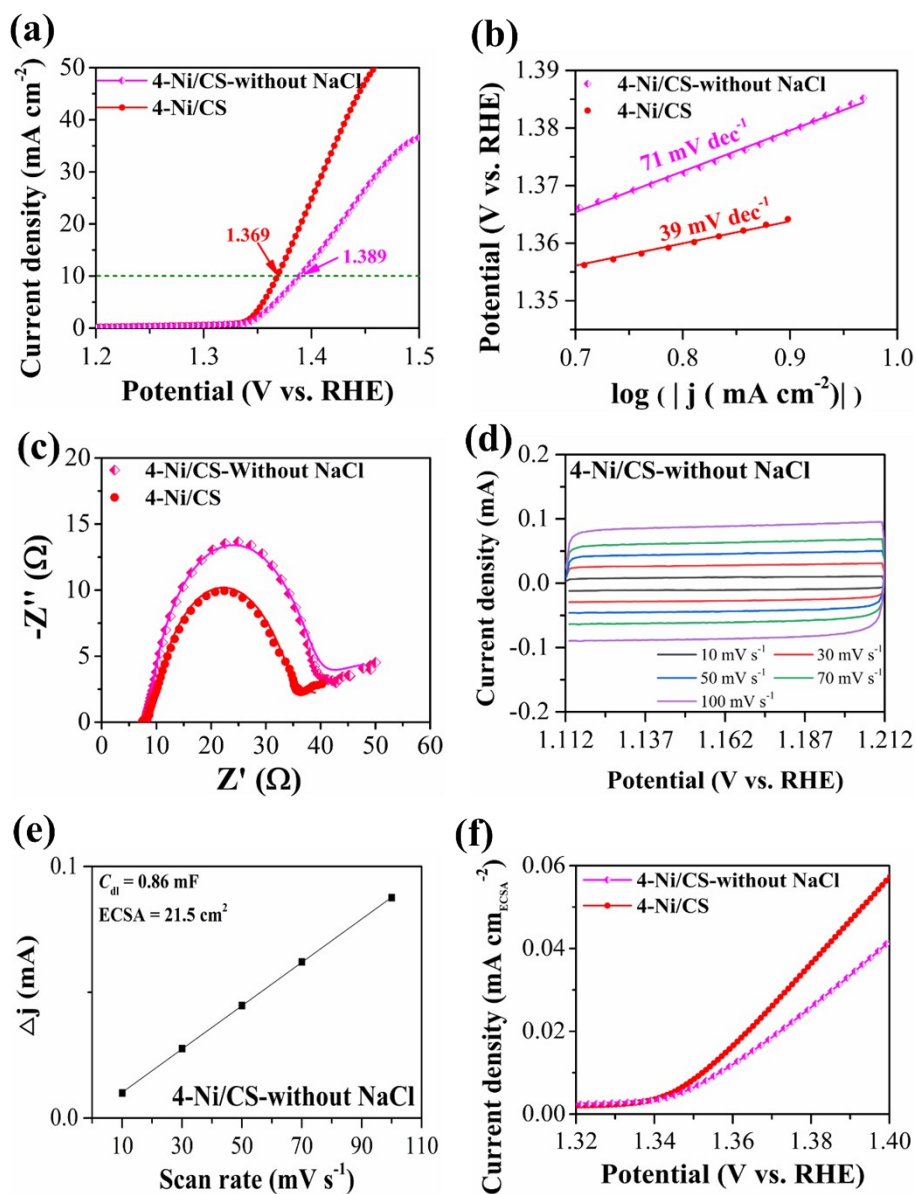

**Fig. S22** (a) UOR LSV curves of 4-Ni/CS and 4-Ni/CS-without NaCl samples at a scan rate of 5 mV s<sup>-1</sup> in 1 M KOH and 0.33 M urea; (b) the corresponding Tafel slopes for UOR; (c) Nyquist plots, (d) CV curves at different scan rates of 10, 30, 50, 70 and 100 mV s<sup>-1</sup>, (e) the corresponding C<sub>dl</sub> and ECSA values, and (f) ECSA normalized UOR LSV curves in 1 M KOH and 0.33 M urea.



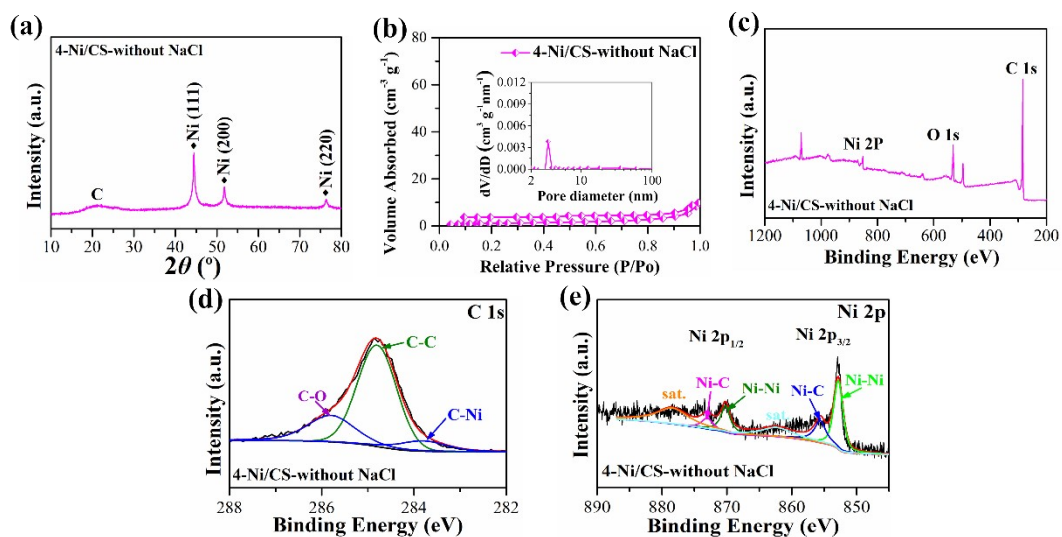

**Fig. S23** XRD pattern (a),  $N_2$  sorption isotherm and the inserted pore size distribution (b), XPS survey spectra (c), C 1s (d), and Ni 2p (e) of the 4-Ni/CS-without NaCl sample.

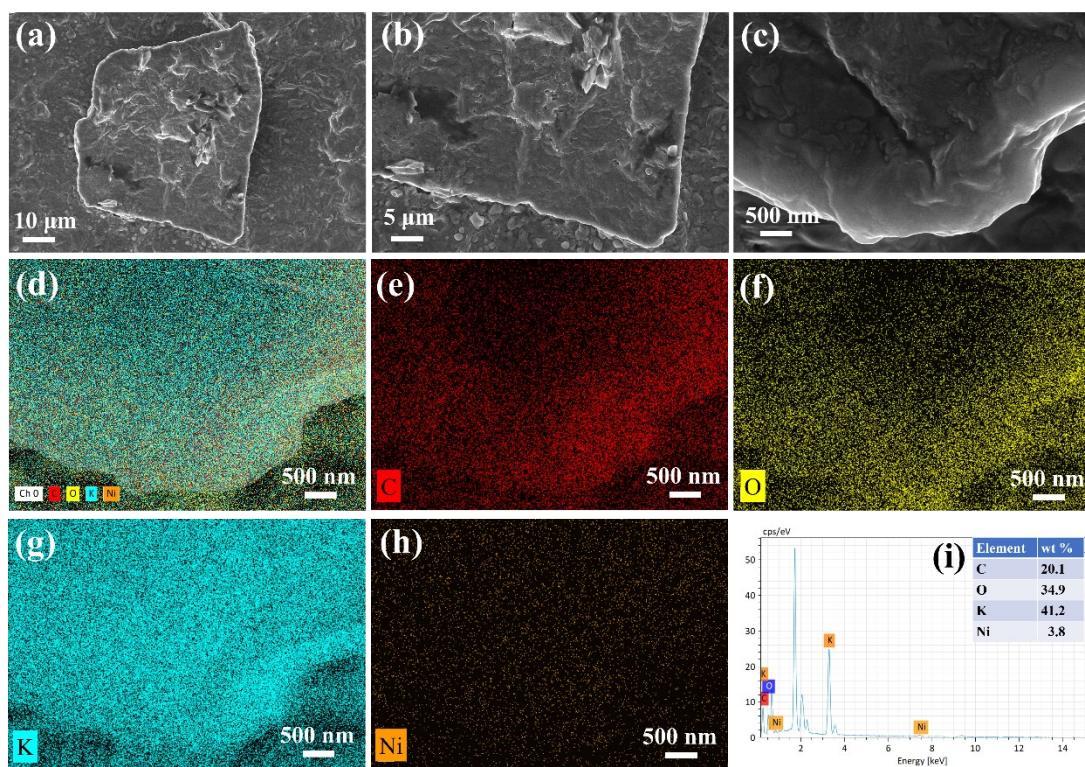

**Fig. S24** SEM images (a-c), element mapping of (d) mix, (e) C, (f) O, (g) K, (h) Ni, and (i) SEM-EDX spectrum of the used 4-Ni/CS after the stability test for overall urea splitting.

**Table S3** Textural and structural properties of 2-Ni/CS, 4-Ni/CS, 8-Ni/CS and 4-Ni/CS-without NaCl samples obtained from N<sub>2</sub> sorption experiments at 77 K.

| <b>Sample</b>        | <b>S<sub>BET</sub> (m<sup>2</sup> g<sup>-1</sup>)</b> | <b>V<sub>p</sub> (cm<sup>3</sup> g<sup>-1</sup>)</b> | <b>D<sub>p</sub> (nm)</b> |
|----------------------|-------------------------------------------------------|------------------------------------------------------|---------------------------|
| 2-Ni/CS              | 186                                                   | 0.54                                                 | 22.5                      |
| 4-Ni/CS              | 128                                                   | 0.39                                                 | 23.5                      |
| 8-Ni/CS              | 112                                                   | 0.28                                                 | 24.1                      |
| 4-Ni/CS-without NaCl | 0.8                                                   | 0.002                                                | -                         |

a

**Table S4** Ni content (wt%) in various samples by ICP-AES analysis.

| <b>Sample</b>        | <b>Ni content (wt%)</b> |
|----------------------|-------------------------|
| 0-Ni/CS              | 0                       |
| 2-Ni/CS              | 46.3                    |
| 4-Ni/CS              | 54.6                    |
| 8-Ni/CS              | 64.5                    |
| 4-Ni/CS-without NaCl | 35.6                    |

**Table S5** Summary of the UOR and OER performances of Ni/CS samples.

| <b>Sample</b> | <b>UOR<sub>j=10</sub></b><br><b>(V vs. RHE)</b> | <b>Tafel slope for UOR</b><br><b>(mV dec<sup>-1</sup>)</b> | <b>OER<sub>j=10</sub></b><br><b>(V vs. RHE)</b> | <b>ΔE<sup>a</sup></b><br><b>(mV)</b> |
|---------------|-------------------------------------------------|------------------------------------------------------------|-------------------------------------------------|--------------------------------------|
| 0-Ni/CS       | -                                               | 132                                                        | 1.772                                           | -                                    |
| 2-Ni/CS       | 1.412                                           | 109                                                        | 1.720                                           | 308                                  |
| 4-Ni/CS       | 1.369                                           | 39                                                         | 1.637                                           | 268                                  |
| 8-Ni/CS       | 1.387                                           | 71                                                         | 1.666                                           | 279                                  |

<sup>a</sup>  $\Delta E = \text{OER}_{j=10} - \text{UOR}_{j=10}$



**Table S6** The simulated values of the devices in equivalent circuits.

| <b>Sample</b> | <b><math>R_s</math> (<math>\Omega</math>)</b> | <b><math>R_1</math> (<math>\Omega</math>)</b> | <b><math>R_2</math> (<math>\Omega</math>)</b> | <b><math>R_t</math> (<math>\Omega</math>)</b> |
|---------------|-----------------------------------------------|-----------------------------------------------|-----------------------------------------------|-----------------------------------------------|
| 0-Ni/CS       | 6.795                                         | 1512                                          | 2.08                                          | 1514.08                                       |
| 2-Ni/CS       | 7.986                                         | 78.45                                         | 35.32                                         | 113.77                                        |
| 4-Ni/CS       | 6.989                                         | 20.88                                         | 22.74                                         | 43.62                                         |
| 8-Ni/CS       | 7.084                                         | 25.24                                         | 26.67                                         | 51.91                                         |

**Table S7** Comparison of the UOR performances of 4-Ni/CS with other reported Ni-based UOR catalysts in 1 M KOH and 0.33 M urea.

| Sample                                                  | Scan rate (mV s <sup>-1</sup> ) | Potential @ 10 mA cm <sup>-2</sup> (V vs. RHE) | Tafel slope (mV dec <sup>-1</sup> ) | Ref.             |
|---------------------------------------------------------|---------------------------------|------------------------------------------------|-------------------------------------|------------------|
| <b>4-Ni/CS</b>                                          | <b>5</b>                        | <b>1.369</b>                                   | <b>39</b>                           | <b>This work</b> |
| Ni-W <sub>x</sub> C/CNTs                                | 10                              | ~1.37                                          | -                                   | 1                |
| Ni/NiO@NC                                               | 5                               | 1.35                                           | 19                                  | 2                |
| M-Ni(OH) <sub>2</sub>                                   | 50                              | 1.40                                           | -                                   | 3                |
| Ni(OH) <sub>2</sub> nanoflakes                          | 20                              | 1.37                                           | 36                                  | 4                |
| NiSe <sub>2</sub> -NiO                                  | 5                               | 1.33                                           | 38                                  | 5                |
| P-NTS-0.5                                               | 5                               | 1.36                                           | 34                                  | 6                |
| Ni-MOF@NiO/Ni-2                                         | 5                               | 1.40                                           | 48.1                                | 7                |
| NixCo <sub>2-x</sub> P/C@HCNs                           | 5                               | 1.33                                           | 74.6                                | 8                |
| Ni(OH) <sub>2</sub> -graphene                           | 10                              | 1.43                                           | -                                   | 9                |
| Ni-MOF                                                  | 10                              | 1.36                                           | 23                                  | 10               |
| Ni/C                                                    | 10                              | 1.38                                           | 77                                  | 11               |
| 35-NiS/NOMC                                             | 10                              | 1.34                                           | 162.23                              | 12               |
| NiClO-D                                                 | 5                               | 1.341                                          | 41                                  | 13               |
| NiOH-D                                                  | 5                               | 1.382                                          | 74                                  | 13               |
| NiCo-2                                                  | 10                              | 1.38                                           | 51.1                                | 14               |
| NiCo-LDH-NO <sub>3</sub>                                | -                               | 1.32                                           | 91                                  | 15               |
| CeO <sub>2</sub> -NiMoO <sub>4</sub>                    | 10                              | 1.35                                           | 35                                  | 16               |
| NF/NiMoO-Ar                                             | 2                               | 1.37                                           | 19                                  | 17               |
| NiF <sub>3</sub> /Ni <sub>2</sub> P@CC                  | 5                               | 1.36                                           | 33                                  | 18               |
| Fe-Ni <sub>3</sub> S <sub>2</sub> @FeNi <sub>3</sub> -8 | 5                               | 1.40                                           | 69                                  | 19               |

**Table S8** Comparison of the performances of urea electrolyzer using 4-Ni/CS as the anode catalyst with other reported electrolyzers.

| <b>Sample</b>                                                                                                    | <b>Electrolyzer</b>       | <b>Potential @ (mA cm<sup>-2</sup>)</b> | <b>Voltage (V)</b> | <b>Ref.</b>      |
|------------------------------------------------------------------------------------------------------------------|---------------------------|-----------------------------------------|--------------------|------------------|
| <b>Pt/C@NF  4-Ni/CS@NF</b>                                                                                       | <b>Urea electrolysis</b>  | <b>10</b>                               | <b>1.372</b>       | <b>This work</b> |
|                                                                                                                  | <b>Water electrolysis</b> | <b>10</b>                               | <b>1.572</b>       |                  |
| <b>Pt/C@NF  RuO<sub>2</sub>@NF</b>                                                                               | <b>Urea electrolysis</b>  | <b>10</b>                               | <b>1.388</b>       | <b>This work</b> |
| <b>NF  NF</b>                                                                                                    | <b>Urea electrolysis</b>  | <b>10</b>                               | <b>1.702</b>       | <b>This work</b> |
| Ni-W <sub>x</sub> C/CNT  W <sub>x</sub> C/CNTs                                                                   | Urea electrolysis         | 10                                      | 1.65               | 1                |
| P-NTS-0.5                                                                                                        | Urea electrolysis         | 10                                      | 1.69               | 6                |
| NixCo <sub>2</sub> -xP/C@HCNs/CC                                                                                 | Urea electrolysis         | 10                                      | 1.47               | 8                |
| NiCoFe-LTH/NF                                                                                                    | Urea electrolysis         | 10                                      | 1.49               | 20               |
| Pt/C  NiCo-2                                                                                                     | Urea electrolysis         | 10                                      | 1.38               | 14               |
| NiCo <sub>2</sub> S <sub>4</sub> NS/CC                                                                           | Urea electrolysis         | 10                                      | 1.45               | 21               |
| CoFeCr LDH/NF                                                                                                    | Urea electrolysis         | 10                                      | 1.329              | 22               |
| NiFeRh-LDH/NF                                                                                                    | Urea electrolysis         | 10                                      | 1.344              | 23               |
| NF/NiMoO-Ar  NF/NiMoO-H <sub>2</sub>                                                                             | Urea electrolysis         | 10                                      | 1.38               | 17               |
| NiF <sub>3</sub> /Ni <sub>2</sub> P@CC  NiF <sub>3</sub> /Ni <sub>2</sub> P@CC                                   | Urea electrolysis         | 10                                      | 1.54               | 18               |
| Fe-Ni <sub>3</sub> S <sub>2</sub> @FeNi <sub>3</sub> -8  Fe-Ni <sub>3</sub> S <sub>2</sub> @FeNi <sub>3</sub> -8 | Urea electrolysis         | 10                                      | 1.50               | 19               |
| MoS <sub>2</sub> /Ni <sub>3</sub> S <sub>2</sub> /Ni/NF  MoS <sub>2</sub> /Ni <sub>3</sub> S <sub>2</sub> /Ni/NF | Urea electrolysis         | 10                                      | 1.38               | 24               |

## References

1. J. H. Fan, Y. P. Dou, R. Jiang, K. F. Du, B. W. Deng and D. H. Wang, *Int. J. Hydrogen Energy*, 2021, **46**, 14932-14943.
2. X. Y. Ji, Y. X. Zhang, Z. Ma and Y. F. Qiu, *ChemSusChem*, 2020, **13**, 5004-5014.
3. X. J. Zhu, X. Y. Dou, J. Dai, X. D. An, Y. Q. Guo, L. D. Zhang, S. Tao, J. Y. Zhao, W. S. Chu, X. C. Zeng, C. Z. Wu and Y. Xie, *Angew. Chem. Int. Ed.*, 2016, **55**, 12465-12469.
4. W. Yang, X. Yang, C. Hou, B. Li, H. Gao, J. Lin and X. Luo, *Appl. Catal. B-Environ.*, 2019, **259**, 118020.
5. Z. Liu, C. Zhang, H. Liu and L. Feng, *Appl. Catal. B-Environ.*, 2020, **276**, 119165.
6. Z. Ji, J. Liu, Y. Deng, S. Zhang, Z. Zhang, P. Du, Y. Zhao and X. Lu, *J. Mater. Chem. A*, 2020, **8**, 14680-14689.
7. Q. Li, S. Zheng, M. Du and H. Pang, *Chem. Eng. J.*, 2021, **417**, 129201.
8. S. Rezaee and S. Shahrokhian, *Nanoscale*, 2020, **12**, 16123-16135.
9. D. Wang, W. Yan, S. H. Vijapur and G. G. Botte, *Electrochim. Acta*, 2013, **89**, 732-736.
10. D. Zhu, C. Guo, J. Liu, L. Wang, Y. Du and S.-Z. Qiao, *Chem. Commun.*, 2017, **53**, 10906-10909.
11. L. Wang, L. Ren, X. Wang, X. Feng, J. Zhou and B. Wang, *ACS Appl. Mater. Interfaces*, 2018, **10**, 4750-4756.
12. R. Banerjee, D. Ghosh, Kirti, D. K. Chanda, A. Mondal, D. N. Srivastava and P. Biswas, *Electrochim. Acta*, 2022, **408**.
13. L. S. Zhang, L. P. Wang, H. P. Lin, Y. X. Liu, J. Y. Ye, Y. Z. Wen, A. Chen, L. Wang, F. L. Ni, Z. Y. Zhou, S. G. Sun, Y. Y. Li, B. Zhang and H. S. Peng, *Angew. Chem. Int. Ed.*, 2019, **58**, 16820-16825.
14. S. L. Wang, X. D. Yang, Z. Liu, D. W. Yang and L. G. Feng, *Nanoscale*, 2020, **12**, 10827-10833.
15. M. Zeng, J. H. Wu, Z. Y. Li, H. H. Wu, J. L. Wang, H. L. Wang, L. He and X. J. Yang, *ACS Sustain. Chem. Eng.*, 2019, **7**, 4777-4783.

16. W. Gao, C. Wang, F. Ma and D. Wen, *Electrochim. Acta*, 2019, **320**, 134608.
17. Z. Y. Yu, C. C. Lang, M. R. Gao, Y. Chen, Q. Q. Fu, Y. Duan and S. H. Yu, *Energy Environ. Sci.*, 2018, **11**, 1890-1897.
18. K. Wang, W. Huang, Q. Cao, Y. Zhao, X. Sun, R. Ding, W. Lin, E. Liu and P. Gao, *Chem. Eng. J.*, 2022, **427**, 130865.
19. W. Zhang, Q. Jia, H. Liang, L. Cui, D. Wei and J. Liu, *Chem. Eng. J.*, 2020, **396**, 125315.
20. K. Patil, P. Babar, H. Bae, E. Jo, J. S. Jang, P. Bhoite, S. Kolekar and J. H. Kim, *Sustainable Energy Fuels*, 2022, **6**, 474-483.
21. W. X. Zhu, M. R. Ren, N. Hu, W. T. Zhang, Z. T. Luo, R. Wang, J. Wang, L. J. Huang, Y. R. Suo and J. L. Wang, *ACS Sustain. Chem. Eng.*, 2018, **6**, 5011-5020.
22. Z. L. Wang, W. J. Liu, Y. M. Hu, M. L. Guan, L. Xu, H. P. Li, J. Bao and H. M. Li, *Appl. Catal. B-Environ.*, 2020, **272**.
23. H. C. A. Sun, W. Zhang, J. G. Li, Z. S. Li, X. Ao, K. H. Xue, K. K. Ostrikov, J. Tang and C. D. Wang, *Appl. Catal. B-Environ.*, 2021, **284**.
24. F. Li, J. Chen, D. Zhang, W.-F. Fu, Y. Chen, Z. Wen and X.-J. Lv, *Chem. Commun.*, 2018, **54**, 5181-5184.
